# Supplementary material for: Hypomethylation of the MEG8:Int2-DMR in patients with pathogenic PLAG1 variants suggests new role of the chr14q32 imprinting cluster in Silver-Russell syndrome
Source: Research Square preprint supplement (doi:10.21203/rs.3.rs-7693802/v1), 2025-10-08
Supplement: Supplementary file 1 [file fe33c07557ed398739ba8732.xlsx]

## Sheet: S1
Table S1: Clinical information on patients with PLAG1 variants and their relatives
Cases	Clinical features of proband	Note on family members
SRS1	NH-CSS = 4/6 Small for gestational age, feeding difficulties during infancy, prominent forehead with triangular face, relative macrocephaly at birth
SRS2	NH-CSS = 4/6 Small for gestational age, postnatal growth failure, feeding difficulties during infancy, prominent forehead with triangular face	Mother: Small for gestational age, prominent forehead with triangular face
		Proband’s sister: NH-CSS = 3/6 Small for gestational age, postnatal growth failure, feeding difficulties during infancy, triangular face, no prominent forehead
SRS3	NH-CSS = 4/6 Small for gestational age, postnatal growth retardation, feeding difficulties during infancy, prominent forehead
SRS4	NH-CSS = 4/6 Small for gestational age, moderate postnatal growth retardation, feeding difficulties, relative macrocephaly, triangular face
SRS55	NH-CSS = 2/6 Feeding difficulties during infancy, triangular face with prominent forehead
SRS6	NH-CSS = 3/5 Post-natal growth retardation, feeding difficulties during infancy, prominent forehead
SRS7	NH-CSS = 4/6 Small for gestational age, postnatal growth failure, feeding difficulties during infancy, relative macrocephaly, triangular face	Mother: growth difficulties in infancy with a final height of 147 cm (−2.51 SDS), triangular face, protruding forehead
SRS8	NH-CSS = 4/6 Small for gestational age, postnatal growth failure, feeding difficulties during infancy, triangular face with protruding forehead	Mother: NH-CS = 4/5 Small for gestational age, postnatal growth failure, feeding difficulties during infancy, triangular face with protruding forehead
SRS9	NH-CSS: 4/6 Small for gestational age, post-natal growth retardation, microcephaly, low body mass index, no protruding forehead	Mother: 144 cm (-3.4 SDS) final height, microcephaly (head circumference 51cm –3.2 SDS)
		Father: 170 cm final height
		Maternal aunt: 149 cm (-2.5 SDS) final height
		Maternal grandmother 155 cm (-1.5 SDS) final height
	Gestational age (weeks of amenorrhea):39w	Maternal grandfather reported as “small”
	Birth weight: 2.130 kg (-2.9 SDS), Birth length: 44.5 cm (-3.4 SDS),
	Birth head circumference: 31 cm (-3.5 SDS)
SRS10	NH-CSS: 4/5 Small for gestational age, post-natal growth retardation, relative macrocephaly, feeding difficulties, forehead: protruding forehead noticed at the age of 3y4m
	Gestational age (weeks of amenorrhea):35w
	Birth weight: 1.220 kg (-3.6 SDS)
	Birth length: 39 cm (-4.1 SDS)
	At 2m: 2.060 kg, 44 cm, head circumference: 34 cm
SRS11	NH-CSS= 3/6 Small for gestational age, post-natal growth retardation, feeding difficulties, head circumference ( -1.5 SDS) but no values available	Mother:158 cm final height
		Father:175 cm final height
	Gestational age (weeks of amenorrhea): 38w +5d
	Birth weight: 2.020 kg (-3.1 SDS), Birth lenght: 42cm (-4.7 SDS),
	Birth head circumference: 30.5 cm (-3.9 SDS)
	No relative macrocephaly at birth
	At 2y5m: 7. 630 kg (BMI –3.4 SDS), 79.5 cm (-2.5 SDS), head circumference: 43.5 cm (-3.5 SDS)
SRS12	NH-CSS = 4/6 Small for gestational age, postnatal growth failure, feeding difficulties during infancy, prominent forehead with triangular face	Mother: prominent forehead with triangular face
		Proband’s brother :no clinical information available
SRS13	NH-CSS = 4/6 Small for gestational age, postnatal growth failure, feeding difficulties during infancy, prominent forehead with triangular face	Mother: feeding difficulties during infancy, prominent forehead with triangular face
SRS14	NH-CSS = 3/5 Small for gestational age, postnatal growth retardation, triangular face with prominent forehead	Mother: no clinical information available
SRS15	NH-CSS = 4/6 Small for gestational age, postnatal growth retardation, protruding forehead, feeding difficulties	Mother 150cm final height , small height and weight, feeding difficulties
		Father:160 cm final height, preterm, small birth lenght and birth weight , Diabetes type2, dyslipemia
		Maternal grandmother : asymptomatic
		Maternal grandfather: reported as "small", limbs lengthening
	Gestational age (weeks of amenorrhea): 39w+2d
	Birth weight: 2.700kg, Birth lengtht: 46cm,
	Birth head circumference: 33.5cm
SRS16	NH-CSS = 2/6 Intrauterine and postnatal growth retardation, low BMI, microcephaly, hypospadias	Mother: asymptomatic (final height 150 cm)
	Gestational age (weeks of amenorrhea):31w
	Birth lenght :36cm(-3.1 SDS), Birth weight :1.050kg (-2.5 SDS),
	Birth head circumference: 26.5cm(-1.6 SDS)
	At 3y: 86cm (-2.3 SDS), 10kg (BMI -2.2 SDS), head circumference 45 cm (-4.3 SDS)
SRS17	NH-CSS = 4/6 Small for gestational age, postnatal growth retardation, low BMI, relative macrocephaly at birth (but not after birth)	Mother: 155 cm final height
		Father: 172 cm final height
	Gestational age (weeks of amenorrhea): 40w
	Birth weight : 2140 g (-2,9SDS)
	Birth length : 42 cm (-4,8SDS)
	Birth head circumference : 33 cm (-2,0SDS)
	At 9y:119,5 cm (-2,1 SDS), 18kg (BM1 -2,5 SDS), head circumference 48,5 cm (-3,5SDS). Small hands annd feet, clinodactyly of the second toes

## Sheet: S2
Table S2: MS-MLPA results of the PLAG1 cases
Cases	Family members	H19/IGF2:IG-DMR	MEG3:TSS-DMR	GNAS-NESP:TSS-DMR	PLAGL1:alt-TSS-DMR	GRB10:alt-TSS-DMR	MEST:alt-TSS-DMR	KCNQ1OT1:TSS-DMR	MEG8:Int2-DMR	SNURF:TSS-DMR	ZNF597:3' DMR*	PEG3:TSS-DMR	GNAS-AS1:TSS-DMR	GNAS-XL:Ex1-DMR	GNAS A/B:TSS-DMR
SRS1	Proband	0.6	0.555	0.54	0.595	0.535	0.54	0.575	0.335	0.54	0.61	0.563	0.52	0.55	0.61
	Mother	NA	NA	NA	NA	NA	NA	NA	NA	NA	NA	NA	NA	NA	NA
	Father	NA	NA	NA	NA	NA	NA	NA	NA	NA	NA	NA	NA	NA	NA
SRS2	Proband	0.57	0.615	0.59	0.64	0.58	0.56	0.615	0.215	0.535	0.65	0.55	0.56	0.54	0.62
	Mother	0.51	0.525	0.55	0.5	0.5	0.535	0.51	0.115	0.51	0.585	0.57	0.55	0.515	0.54
	Father	NA	NA	NA	NA	NA	NA	NA	NA	NA	NA	NA	NA	NA	NA
	Proband’s sister	0.53	0.6	0.55	0.575	0.555	0.56	0.57	0.335	0.51	-	0.52	0.57	0.51	0.51
SRS3	Proband	0.6	0.55	0.53	64$	0.61	0.61	0.64	0.42	0.55	0.57	0.58	0.55	0.55	0.57
	Mother	NA	NA	NA	NA	NA	NA	NA	NA	NA	NA	NA	NA	NA	NA
	Father	NA	NA	NA	NA	NA	NA	NA	NA	NA	NA	NA	NA	NA	NA
SRS4	Proband	0.52	0.58	0.55	0.56	0.55	0.56	0.56	0.45	0.52	-	0.55	0.55	0.52	0.55
	Mother	NA	NA	NA	NA	NA	NA	NA	NA	NA	NA	NA	NA	NA	NA
	Father	NA	NA	NA	NA	NA	NA	NA	NA	NA	NA	NA	NA	NA	NA
SRS5	Proband	0.6	0.55	0.55	0.65	0.61	0.59	0.64	0.3	0.53	0.54	0.57	0.56	0.53	0.58
	Mother	NA	NA	NA	NA	NA	NA	NA	NA	NA	NA	NA	NA	NA	NA
	Father	NA	NA	NA	NA	NA	NA	NA	NA	NA	NA	NA	NA	NA	NA
SRS6	Proband	0.59	0.57	0.53	0.63	0.6	0.6	0.65	0.45	0.51	0.66	0.58	0.58	0.55	0.58
	Mother	NA	NA	NA	NA	NA	NA	NA	NA	NA	NA	NA	NA	NA	NA
	Father	NA	NA	NA	NA	NA	NA	NA	NA	NA	NA	NA	NA	NA	NA
SRS7	Proband	0.55	0.53	0.56	0.5	0.49	0.56	0.53	0.18	0.53	-	0.55	0.52	0.52	0.52
	Mother	0.5	0.51	0.57	0.47	0.49	0.5	0.54	0.27	0.5	-	0.55	0.58	0.48	0.49
	Father	0.51	0.5	0.54	0.49	0.48	0.5	0.5	0.48	0.51	-	0.51	0.58	0.49	0.47
SRS8	Proband	0.48	0.5	0.52	0.51	0.48	0.49	0.52	0.17	0.51	-	0.51	0.54	0.47	0.5
	Mother	0.51	0.52	0.54	0.51	0.48	0.53	0.52	0.1	0.5	-	0.55	0.54	0.49	0.5
	Father	0.53	0.55	0.49	0.55	0.56	0.53	0.57	0.5	0.56	-	0.55	0.6	0.52	0.55
SRS9	Proband	0.54	0.56	0.56	0.55	0.55	0.56	0.56	0.21	0.53	0.535	0.547	0.54	0.55	0.51
	Mother	0.51	0.58	0.55	0.54	0.55	0.515	0.555	0.12	0.465	0.54	0.54	0.53	0.515	0.47
	Father	NA	NA	NA	NA	NA	NA	NA	NA	NA	NA	NA	NA	NA	NA
SRS10	Proband	0.53	0.575	0.52	0.57	0.55	0.515	0.575	0.18	0.48	0.66	0.593	0.54	0.505	0.48
	Mother	NA	NA	NA	NA	NA	NA	NA	NA	NA	NA	NA	NA	NA	NA
	Father	NA	NA	NA	NA	NA	NA	NA	NA	NA	NA	NA	NA	NA	NA
SRS11	Proband	0.54	0.62	0.54	0.635	0.575	0.515	0.565	0.195	0.52	0.555	0.56	0.54	0.54	0.5
	Mother	NA	NA	NA	NA	NA	NA	NA	NA	NA	NA	NA	NA	NA	NA
	Father	NA	NA	NA	NA	NA	NA	NA	NA	NA	NA	NA	NA	NA	NA
SRS12	Proband	0.52	0.535	0.53	0.545	0.53	0.53	0.56	0.185	0.52	-	0.54	0.505	0.5	0.51
	Mother	0.51	0.52	0.56	0.535	0.545	0.495	0.53	0.18	0.46	-	0.49	0.525	0.53	0.49
	Father	0.54	0.54	0.54	0.535	0.515	0.545	0.54	0.46	0.515	-	0.54	0.505	0.53	0.49
	Proband’s brother	0.49	0.505	0.51	0.54	0.485	0.49	0.535	0.18	0.495	-	0.52	0.505	0.51	0.48
SRS13	Proband	0.52	0.54	0.54	0.545	0.51	0.515	0.585	0.21	0.535	-	0.49	0.485	0.485	0.48
	Mother	0.48	0.53	0.52	0.495	0.495	0.51	0.52	0.335	0.495	-	0.52	0.455	0.41	0.41
	Father	0.54	0.54	0.54	0.535	0.515	0.545	0.54	0.47	0.515	-	0.54	0.505	0.53	0.49
SRS14	Proband	0.52	0.525	0.53	0.52	0.505	0.525	0.54	0.27	0.52	-	0.52	0.54	0.525	0.51
	Mother	0.52	0.53	0.53	0.52	0.51	0.525	0.54	0.27	0.53	-	0.52	0.54	0.52	0.51
	Father	0.54	0.54	0.54	0.535	0.515	0.55	0.54	0.48	0.52	-	0.54	0.505	0.53	0.49
SRS15	Proband	0.54	0.54	0.53	0.54	0.56	0.57	0.55	0.5	0.53	0.59	0.52	0.56	0.51	0.47
	Mother	0.52	0.575	0.52	0.535	0.515	0.515	0.545	0.485	0.535	0.53	0.58	0.53	0.55	0.51
	Father	NA	NA	NA	NA	NA	NA	NA	NA	NA	NA	NA	NA	NA	NA
SRS16	Proband	0.53	0.595	0.54	0.585	0.545	0.55	0.565	0.45	0.52	0.6	0.52	0.53	0.495	0.54
	Mother	NA	NA	NA	NA	NA	NA	NA	NA	NA	NA	NA	NA	NA	NA
	Father	NA	NA	NA	NA	NA	NA	NA	NA	NA	NA	NA	NA	NA	NA
SRS17	Proband	0.55	0.565	0.56	0.525	0.55	0.545	0.55	0.42	0.505	0.56	0.56	0.56	0.555	0.53
	Mother	NA	NA	NA	NA	NA	NA	NA	NA	NA	NA	NA	NA	NA	NA
	Father	NA	NA	NA	NA	NA	NA	NA	NA	NA	NA	NA	NA	NA	NA
	hypomethylation
The MS-MLPA multilocus kits C1 or D1 have two probes for the MEG8:Int2-DMR targeting three CpGs (chr14:100,904,518; chr14:100,904,601; chr14:100,904,621)
* two probes targeting the ZNF597:3' DMR are included in the ME034-D1 kit but not in the C1

## Sheet: S3
Table S3: MS-MLPA results of the HMGA2 and IGF2 cases
Cases	Genetic variant	H19/IGF2:IG-DMR	MEG3:TSS-DMR	GNAS-NESP:TSS-DMR	PLAGL1:alt-TSS-DMR	GRB10:alt-TSS-DMR	MEST:alt-TSS-DMR	KCNQ1OT1:TSS-DMR	MEG8:Int2-DMR	SNURF:TSS-DMR	ZNF597:3' DMR	PEG3:TSS-DMR	GNAS-AS1:TSS-DMR	GNAS-XL:Ex1-DMR	GNAS A/B:TSS-DMR
SRS18	HMGA2	0.51	0.5	0.53	0.495	0.475	0.515	0.54	0.46	0.5	0.55	0.55	0.55	0.52	0.53
SRS19	HMGA2	0.55	0.555	0.53	0.545	0.545	0.515	0.57	0.5	0.505	0.605	0.53	0.6	0.53	0.53
SRS20	HMGA2	0.57	0.58	0.52	0.545	0.56	0.52	0.56	0.475	0.52	0.48	0.53	0.54	0.515	0.48
SRS21	HMGA2	0.52	0.505	0.51	0.52	0.52	0.535	0.59	0.46	0.505	0.555	0.54	0.55	0.555	0.56
SRS22	HMGA2	0.56	0.565	0.54	0.535	0.54	0.545	0.615	0.495	0.57	0.56	0.56	0.62	0.56	0.61
SRS23	HMGA2	0.52	0.54	0.56	0.575	0.545	0.565	0.55	0.44	0.51	0.565	0.54	0.49	0.54	0.55
SRS24	HMGA2	0.51	0.55	0.53	0.56	0.525	0.51	0.545	0.51	0.515	0.62	0.54	0.52	0.52	0.51
SRS25	IGF2	0.51	0.57	0.52	0.545	0.54	0.525	0.58	0.445	0.5	0.5	0.5	0.51	0.535	0.51
SRS26	IGF2	0.55	0.595	0.53	0.565	0.56	0.555	0.56	0.47	0.47	0.57	0.51	0.58	0.515	0.48
SRS27	IGF2	0.61	0.595	0.58	0.555	0.575	0.59	0.645	0.5	0.52	0.545	0.54	0.62	0.52	0.53
SRS28	IGF2	0.53	0.55	0.52	0.575	0.535	0.545	0.545	0.525	0.555	0.57	0.55	0.53	0.58	0.6
SRS29	IGF2	0.56	0.565	0.51	0.52	0.55	0.545	0.55	0.495	0.52	0.525	0.54	0.54	0.54	0.52
SRS30	IGF2	0.52	0.54	0.55	0.545	0.53	0.54	0.555	0.455	0.455	0.53	0.5	0.52	0.5	0.47
SRS31	IGF2	0.57	0.585	0.56	0.6	0.55	0.555	0.6	0.47	0.505	0.6	0.54	0.55	0.525	0.54
SRS32	IGF2	0.52	0.565	0.53	0.565	0.545	0.52	0.55	0.485	0.5	0.575	0.52	0.49	0.5	0.48

## Sheet: S4
Table S4: MS-MLPA results in different SRS molecular subgroups
Cases	Molecular defect	H19/IGF2:IG-DMR	MEG3:TSS-DMR	GNAS-NESP:TSS-DMR	PLAGL1:alt-TSS-DMR	GRB10:alt-TSS-DMR	MEST:alt-TSS-DMR	KCNQ1OT1:TSS-DMR	MEG8:Int2-DMR	SNURF:TSS-DMR	PEG3:TSS-DMR	GNAS-AS1:TSS-DMR	GNAS-XL:Ex1-DMR	GNAS A/B:TSS-DMR
SRS33	IC1-LoM	0.28	0.48	0.56	0.525	0.53	0.54	0.595	0.44	0.53	0.53	0.57	0.475	0.46
SRS34	IC1-LoM	0.15	0.545	0.58	0.59	0.545	0.54	0.575	0.47	0.535	0.59	0.57	0.5	0.52
SRS35	IC1-LoM	0.2	0.53	0.54	0.495	0.51	0.555	0.555	0.44	0.52	0.51	0.56	0.525	0.59
SRS36	IC1-LoM	0.21	0.485	0.53	0.535	0.555	0.53	0.525	0.465	0.515	0.59	0.58	0.525	0.49
SRS37	IC1-LoM	0.28	0.52	0.59	0.555	0.47	0.5	0.53	0.43	0.505	0.5	0.5	0.43	0.6
SRS38	IC1-LoM	0.19	0.545	0.54	0.495	0.505	0.525	0.505	0.485	0.51	0.56	0.49	0.51	0.46
SRS39	IC1-LoM	0.16	0.485	0.51	0.455	0.485	0.53	0.53	0.52	0.495	0.53	0.56	0.485	0.47
SRS40	IC1-LoM	0.19	0.535	0.56	0.53	0.57	0.5	0.51	0.42	0.545	0.51	0.54	0.5	0.47
SRS41	IC1-LoM	0.28	0.54	0.54	0.555	0.51	0.54	0.535	0.52	0.48	0.5	0.6	0.47	0.51
SRS42	IC1-LoM	0.3	0.55	0.54	0.535	0.525	0.505	0.545	0.485	0.49	0.51	0.55	0.485	0.48
SRS43	IC1-LoM	0.33	0.515	0.52	0.5	0.51	0.53	0.555	0.485	0.51	0.56	0.52	0.51	0.49
SRS44	IC1-LoM	0.09	0.525	0.55	0.52	0.5	0.505	0.5	0.52	0.525	0.52	0.48	0.51	0.49
SRS45	IC1-LoM	0.2	0.53	0.54	0.495	0.51	0.555	0.555	0.43	0.52	0.51	0.56	0.525	0.59
SRS46	IC1-LoM	0.29	0.52	0.59	0.555	0.47	0.5	0.53	0.52	0.505	0.5	0.5	0.43	0.59
SRS47	IC1-LoM	0.19	0.545	0.54	0.495	0.505	0.525	0.505	0.485	0.51	0.56	0.49	0.51	0.46
SRS48	IC1-LoM	0.08	0.485	0.51	0.455	0.485	0.52	0.53	0.475	0.495	0.53	0.56	0.485	0.47
SRS49	IC1-LoM	0.32	0.56	0.52	0.55	0.515	0.555	0.555	0.49	0.51	0.53	0.55	0.53	0.47
SRS50	IC1-LoM	0.27	0.56	0.55	0.5	0.515	0.555	0.56	0.51	0.515	0.54	0.54	0.545	0.55
SRS51	IC1-LoM	0.38	0.5	0.52	0.48	0.565	0.555	0.55	0.44	0.52	0.54	0.53	0.545	0.54
SRS52	IC1-LoM	0.28	0.53	0.54	0.555	0.51	0.54	0.535	0.55	0.48	0.5	0.55	0.47	0.51
SRS53	IC1-LoM	0.21	0.47	0.53	0.52	0.555	0.52	0.525	0.47	0.5	0.52	0.49	0.5	0.49
SRS54	IC1-LoM	0.22	0.48	0.55	0.49	0.52	0.51	0.54	0.485	0.49	0.5	0.48	0.51	0.5
SRS55	IC1-LoM	0.19	0.535	0.54	0.53	0.54	0.5	0.51	0.43	0.5	0.49	0.5	0.52	0.51
SRS56	IC1-LoM	0.2	0.53	0.54	0.49	0.51	0.54	0.51	0.475	0.51	0.51	0.47	0.5	0.5
SRS57	IC1-LoM	0.26	0.49	0.55	0.48	0.52	0.53	0.57	0.485	0.52	0.55	0.48	0.47	0.5
SRS58	IC1-LoM	0.275	0.5	0.555	0.48	0.53	0.55	0.59	0.445	0.54	0.54	0.5	0.485	0.51
SRS59	IC1-LoM	0.16	0.48	0.53	0.5	0.505	0.52	0.55	0.44	0.53	0.56	0.55	0.5	0.49
SRS60	IC1-LoM	0.2	0.485	0.56	0.49	0.51	0.53	0.56	0.47	0.54	0.53	0.52	0.51	0.5
SRS61	upd(7)mat	0.51	0.5	0.57	0.545	0.99	0.99	0.55	0.52	0.48	0.55	0.53	0.52	0.48
SRS62	upd(7)mat	0.49	0.475	0.54	0.46	0.88	0.91	0.535	0.48	0.415	0.52	0.54	0.52	0.52
SRS63	upd(7)mat	0.49	0.49	0.48	0.47	0.99	0.97	0.5	0.47	0.5	0.49	0.48	0.5	0.5
SRS64	upd(7)mat	0.5	0.5	0.53	0.535	0.9	0.87	0.49	0.49	0.51	0.5	0.5	0.51	0.52
SRS65	idiopathic cases	0.51	0.53	0.54	0.525	0.51	0.505	0.545	0.49	0.505	0.52	0.51	0.51	0.53
SRS66	idiopathic cases	0.49	0.49	0.54	0.53	0.5	0.51	0.53	0.47	0.51	0.51	0.51	0.49	0.495
SRS67	idiopathic cases	0.45	0.54	0.55	0.54	0.515	0.52	0.54	0.5	0.49	0.47	0.51	0.5	0.51
SRS68	idiopathic cases	0.51	0.53	0.51	0.52	0.515	0.5	0.54	0.52	0.505	0.52	0.54	0.53	0.515
SRS69	idiopathic cases	0.55	0.49	0.55	0.505	0.52	0.54	0.585	0.47	0.5	0.53	0.495	0.495	0.52
SRS70	idiopathic cases	0.55	0.48	0.54	0.51	0.48	0.505	0.58	0.5	0.52	0.54	0.51	0.51	0.48
SRS71	idiopathic cases	0.52	0.48	0.56	0.495	0.5	0.54	0.56	0.49	0.51	0.5	0.515	0.485	0.54
SRS72	idiopathic cases	0.49	0.5	0.53	0.51	0.48	0.505	0.55	0.55	0.47	0.52	0.52	0.5	0.505
SRS73	idiopathic cases	0.5	0.49	0.55	0.515	0.48	0.555	0.58	0.5	0.49	0.51	0.48	0.51	0.54
SRS74	idiopathic cases	0.53	0.55	0.52	0.52	0.5	0.54	0.56	0.485	0.52	0.51	0.5	0.5	0.505
SRS75	idiopathic cases	0.51	0.56	0.51	0.48	0.49	0.55	0.49	0.4	0.5	0.55	0.52	0.5	0.51
SRS76	idiopathic cases	0.46	0.55	0.5	0.5	0.545	0.52	0.52	0.49	0.5	0.55	0.53	0.51	0.52
SRS77	idiopathic cases	0.455	0.535	0.515	0.52	0.46	0.49	0.53	0.51	0.52	0.55	0.495	0.515	0.515
SRS78	idiopathic cases	0.47	0.48	0.52	0.49	0.5	0.5	0.545	0.47	0.5	0.56	0.51	0.52	0.52
SRS79	idiopathic cases	0.49	0.415	0.48	0.5	0.49	0.53	0.54	0.48	0.485	0.55	0.485	0.48	0.48
SRS80	idiopathic cases	0.52	0.5	0.47	0.52	0.55	0.54	0.505	0.51	0.4	0.535	0.5	0.52	0.515
SRS81	idiopathic cases	0.5	0.51	0.535	0.51	0.505	0.53	0.54	0.445	0.56	0.5	0.51	0.48	0.52
SRS82	idiopathic cases	0.54	0.505	0.525	0.5	0.51	0.49	0.52	0.51	0.53	0.505	0.52	0.54	0.52
SRS83	idiopathic cases	0.46	0.51	0.53	0.49	0.52	0.48	0.535	0.51	0.55	0.51	0.515	0.55	0.55
SRS84	idiopathic cases	0.47	0.54	0.54	0.545	0.545	0.48	0.555	0.47	0.52	0.52	0.52	0.52	0.52
SRS85	idiopathic cases	0.535	0.54	0.52	0.53	0.53	0.52	0.57	0.45	0.51	0.5	0.48	0.49	0.49
SRS86	idiopathic cases	0.49	0.55	0.485	0.5	0.4	0.51	0.52	0.51	0.5	0.54	0.515	0.5	0.5
SRS87	idiopathic cases	0.545	0.51	0.485	0.49	0.49	0.5	0.49	0.51	0.5	0.505	0.52	0.53	0.53
SRS88	idiopathic cases	0.53	0.55	0.52	0.545	0.51	0.515	0.545	0.515	0.49	0.51	0.48	0.43	0.5
SRS89	idiopathic cases	0.51	0.52	0.43	0.46	0.47	0.52	0.46	0.5	0.545	0.495	0.52	0.475	0.52
SRS90	idiopathic cases	0.49	0.51	0.52	0.47	0.51	0.48	0.5	0.52	0.46	0.51	0.48	0.46	0.47
SRS91	idiopathic cases	0.485	0.5	0.485	0.48	0.515	0.5	0.51	0.54	0.515	0.515	0.54	0.445	0.5
SRS92	idiopathic cases	0.475	0.515	0.475	0.48	0.5	0.51	0.54	0.5	0.49	0.52	0.53	0.44	0.47
SRS93	idiopathic cases	0.49	0.415	0.49	0.465	0.52	0.505	0.54	0.475	0.5	0.515	0.52	0.47	0.55
SRS94	idiopathic cases	0.51	0.5	0.515	0.48	0.54	0.51	0.53	0.47	0.53	0.5	0.54	0.52	0.53
SRS95	idiopathic cases	0.46	0.51	0.52	0.48	0.52	0.54	0.51	0.515	0.52	0.52	0.55	0.55	0.52
	hypomethylation
	hypermethylation

## Sheet: S5
Table S5: MS-MLPA results of the MEG8:Int2-DMR methylation in controls
Controls		MEG8:Int2-DMR methylation (MS-MLPA ME034 kit)
Control 1		0.48
Control 2		0.47
Control 3		0.49
Control 4		0.49
Control 5		0.49
Control 6		0.49
Control 7		0.495
Control 8		0.51
Control 9		0.54
Control 10		0.48
Control 11		0.47
Control 12		0.5
Control 13		0.455
Control 14		0.46
Control 15		0.49
Control 16		0.475
Control 17		0.51
Control 18		0.495
Control 19		0.43
Control 20		0.44
Control 21		0.43
Control 22		0.51
Control 23		0.445
Control 24		0.44
Control 25		0.5
Control 26		0.475
Control 27		0.47
Control 28		0.455
Control 29		0.51
Control 30		0.455
Control 31		0.45
Control 32		0.505
Control 33		0.48
Control 34		0.45
Control 35		0.5
Control 36		0.51
Control 37		0.44
Control 38		0.485
Control 39		0.405
Control 40		0.485
Control 41		0.47
Control 42		0.47
Control 43		0.4
Control 44		0.47
Control 45		0.41
Control 46		0.455
Control 47		0.545
Control 48		0.45
Control 49		0.4
Control 50		0.44
Control 51		0.44
Control 52		0.465
Control 53		0.29	Refer to the main text
Control 54		0.28
	hypomethylation

## Sheet: S6
Table S6: Pyrosequencing analyses in cases with PLAG1 variants
PYROSEQUENCING 1	MEG8:Int2-DMR
Cases	CpGs
	1	2	3	4	5	6	7	8	9	10	11	12	13
	chr14:100904601	chr14:100904618	chr14: 100904621	chr14: 100904633	chr14: 100904642	chr14: 100904646	chr14: 100904651	chr14: 100904654	chr14: 100904663	chr14: 100904667	chr14: 100904672	chr14: 100904692	chr14: 100904702	MEAN
SRS12	-20.4444	-20.8889	-18.1481	-9.66667	-15.8148	-10	-12.1111	-12.2593	-19	-17.7778	-10	-17.6296	-11.4074	-15.0114
SRS12's mother	-18.4444	-14.8889	-14.1481	-10	-14.8148	-10	-10.1111	-12.2593	-18	-16.7778	-11	-15.6296	-11.4074	-13.6524
SRS12's father	3.55556	4.11111	1.85185	1.33333	5.18519	3	1.88889	2.74074	0	1.22222	4.66667	5.37037	2.59259	2.88604
SRS12's brother	-34.4444	-34.8889	-35.1481	-28.6667	-31.8148	-29.5926	-31.1111	-30.2593	-37	-35.7778	-23.3333	-27.6296	-35.4074	-31.9288
SRS13	-20.4444	-19.8889	-18.1481	-14.6667	-15.8148	-9.59259	-15.1111	-15.2593	-17	-15.7778	-13.3333	-17.6296	-14.4074	-15.9288
SRS13's mother	-12.4444	-3	-16.1481	-10	-11.8148	-10	-10	-10.2593	-10	-10	-10	-18.6296	-13.4074	-11.208
SRS13's father	1	2.11111	0.851852	2.33333	0.185185	3.40741	1.88889	1.74074	2	3	1	1	1	1.65527
SRS14	-24.4444	-22.8889	-29.1481	-37.6667	-33.8148	-38.5926	-40.1111	-35.2593	-35	-37.7778	-30.3333	-24.6296	-36.4074	-32.7749
SRS14's mother	-32.4444	-30.8889	-33.1481	-35.6667	-37.8148	-34.5926	-38.1111	-38.2593	-42	-39.7778	-30.3333	-31.6296	-39.4074	-35.698
SRS14's father	2	3	3	-1.66667	3	3	2	-1	12	-1	2	-1	0	1.94872
Control 1	4.55556	-0.888889	1.85185	-2	3	0	2	2.74074	2	1.22222	2.66667	-0.62963	1.59259	1.39316
Control 2	-5	-2	-2.14815	-3.66667	-2.81481	0.407407	-0.111111	-2.25926	-5	4.22222	0.666667	-2.62963	2.59259	-1.36467
Control 3	-2	-4.88889	-2	-2	-1.81481	-1	-1	-1	-2	0	-1.33333	-2.62963	-1.40741	-1.77493
Control 4	-4.44444	2	-2.14815	-0.666667	2	0.407407	-2.11111	3	2	2.22222	-1.33333	0.37037	0.592593	0.145299
Control 5	0.555556	0.111111	-1.14815	1.33333	1.18519	4.40741	1.88889	0.740741	0	0.222222	0.666667	1.37037	2.59259	1.07123
Control 6	-2.44444	0.111111	-3.14815	-0.666667	0.185185	1.40741	-1.11111	-2.25926	1	0.222222	2.66667	-5	-5	-1.07977
Control 7	-0.444444	-0.888889	-0.148148	3.33333	1.18519	5.40741	0.888889	1.74074	-4	-4.77778	-1.33333	-3.62963	-3.40741	-0.467236
Control 8	-4.44444	-5	-5	2	2	3	2	2	0	-3.77778	-1.33333	-4.62963	-3.40741	-1.27635
Control 9	0	2	2	2	3	5	0	2	0	4.22222	4.66667	3	-0.407407	2.11396
Control 10	3.55556	2.11111	0.851852	-0.666667	2.18519	-0.592593	-1.11111	1.74074	0	3.22222	0.666667	0.37037	0.592593	0.994302
Control 11	2	-1	2	-1	3	2	3	5	0	2.22222	3.66667	0.37037	3.59259	1.91168
Control 12	-3	-1.88889	-2.14815	0.333333	0.185185	0.407407	-2.11111	-1.25926	-4	-1.77778	-2.33333	-3.62963	-0.407407	-1.66382
Control 13	-2.44444	-2.88889	-2.14815	-1.66667	-3.81481	-0.592593	-3.11111	-3.25926	-4	-2	-2.33333	4.37037	0.592593	-1.79202
Control 14	0.555556	0.111111	0.851852	0.333333	0.185185	-1.59259	-2.11111	-0.259259	2	2.22222	2.66667	3.37037	0.592593	0.68661
Control 15	1.55556	-2.88889	-2.14815	-2	0.185185	-4	-5.11111	-0.259259	5	-0.777778	2.66667	1.37037	2.59259	-0.293447
Control 16	-2.44444	-2.88889	-2.14815	-1.66667	-2	-0.592593	0.888889	-1.25926	-4	-1.77778	-1.33333	0	1.59259	-1.35613
Control 17	-2.44444	-3.88889	-5.14815	-4	-0.814815	0	-3	-2	-2	-0.777778	0.666667	1.37037	0.592593	-1.64957
Control 18	-2.44444	-2.88889	-2.14815	-1.66667	-3.81481	-0.592593	-3.11111	-3.25926	-4	-2	-2.33333	3	0.592593	-1.89744
Control 19	-1.44444	-2.88889	-4.14815	-1.66667	-0.814815	0.407407	-2.11111	-2.25926	-1	-2	0.666667	1.37037	0.592593	-1.17664
Control 20	3.55556	2.11111	5.85185	3.33333	5.18519	4.40741	1.88889	2.74074	2	0.222222	3.66667	9.37037	-2.40741	3.22507
Control 21	-0.444444	5.11111	4.85185	0.333333	2.18519	4.40741	-0.111111	0.740741	2	2.22222	3.66667	4.37037	4.59259	2.60969
Control 22	3	4.11111	2.85185	1.33333	0.185185	4.40741	2.88889	3.74074	0	2.22222	1.66667	0.37037	2.59259	2.25926
Control 23	2	3	3.85185	1.33333	3.18519	4	4.88889	2.74074	4	4.22222	2.66667	5.37037	4.59259	3.52707
Control 24	1.55556	1.11111	2.85185	5.33333	0.185185	0	3.88889	4.74074	1	2.22222	2.66667	-2.62963	2.59259	1.96296
Control 25	4.55556	4.11111	0.851852	0	5.18519	0	0	2.74074	-1	5.22222	1.66667	2	1	2.02564
Control 26	-0.444444	3.11111	2.85185	4.33333	3.18519	3.40741	4.88889	2.74074	2	1.22222	2.66667	0.37037	0.592593	2.37892
Control 27	-1.44444	-2.88889	-2	-1.66667	-0.814815	0.407407	-2.11111	-2.25926	-1	-2	0.666667	1.37037	0.592593	-1.0114
PYROSEQUENCING 2	MEG8:Int2-DMR
Cases	CpGs
	1	2	3	4	5	6	7	8	9	10	11	12	13
	chr14:100904601	chr14:100904618	chr14: 100904621	chr14: 100904633	chr14: 100904642	chr14: 100904646	chr14: 100904651	chr14: 100904654	chr14: 100904663	chr14: 100904667	chr14: 100904672	chr14: 100904692	chr14: 100904702	MEAN
SRS1	-18	-18.625	-17.625	-12.625	-12.875	-12.625	-16.25	-12.5	-19.125	-14	-19.5	-5.125	-14	-14.8365
SRS2	-19	-18.625	-19.625	-13.625	-15.875	-14.625	-15.25	-15.5	-21.125	-16	-17.5	-11.125	-15	-16.375
SRS2's sister	-10	-8.625	-13.625	-12.625	-14.875	-11.625	-12.25	-10.5	-22.125	-12	-19.5	-11.125	-16	-13.4519
SRS2's mother	-29	-24.625	-23.625	-22.625	-23.875	-21.625	-24.25	-21.5	-33.125	-24	-23.5	-17.125	-21	-23.8365
SRS3	2	1.375	4.375	4.375	7.125	3.375	3.75	4	-5.125	-3	-0.5	5.875	7	2.66346
SRS4	-3	1.375	-1.625	-4.625	-2.875	-1.625	-1.25	-2.5	-6.125	-4	-5	4.875	-3	-2.25962
SRS5	-2	-2.625	-2	0.375	3.125	0.375	0.75	1.5	-0.125	-4	2.5	9.875	5	0.980769
SRS6	3	4.375	6.375	9.375	8.125	8.375	7.75	8.5	0.875	3	0.5	9.875	7	5.93269
SRS7	-20	-12.625	-19.625	-22.625	-17.875	-22.625	-17.25	-12.5	-27.125	-19	-17.5	-6.125	-19	-17.9904
SRS8	-16	-14.625	-14.625	-20.625	-16.875	-21.625	-23.25	-20.5	-25.125	-20	-22.5	-7.125	-18	-18.5288
SRS9	-18	-18.625	-18.625	-18.625	-17.875	-19.625	-20.25	-16.5	-24.125	-19	-20.5	-9.125	-18	-18.375
SRS9's mother	-23	-21.625	-20.625	-17.625	-18.875	-16.625	-19.25	-18.5	-23.125	-21	-20.5	-11.125	-19	-19.2981
SRS11	-21	-20.625	-19.625	-18.625	-18.875	-17.625	-20.25	-19.5	-27.125	-20	-18.5	-10.125	-18	-19.2212
SRS11's mother	2	-1.625	2	-0.625	-2.875	-3.625	-4.25	-4.5	-2	-3	-2	4.875	-2	-1.35577
SRS15	3	1.375	-0.625	-0.625	-0.875	-1.625	-2.25	-2.5	-3.125	-1	-7.5	7.875	-4	-0.913462
SRS16	2	2.375	-0.625	-0.625	-1.875	-2.625	-2.25	-2.5	-2.125	-2	-5.5	6.875	-4	-0.990385
SRS16's mother	0	-0.625	-2.625	-1.625	-2.875	-2	-2	-2	-3	-2	-2	5.875	-7	-1.68269
SRS17	2	2.375	-1.625	-2.625	-0.875	-1.625	-2.25	-1.5	-4.125	-2	-6.5	6.875	-2	-1.06731
Control 1	-1	-2.625	-1.625	-3.625	-1.875	-2.625	-3.25	-3.5	-2	-3	-5	2.875	-6	-2.55769
Control 2	1	-2	-3	-3.625	0	0	-5.25	0	-2	-3	-2	1.875	-2	-1.53846
Control 3	1	0	0	2	2	-3.625	1	0	0	-2	1	0.875	0	0.173077
Control 4	1	0.375	-0.625	-0.625	-1.875	-3.625	-2.25	-2.5	-2	-2	-3	2	-4	-1.47115
Control 5	-4	-3.625	-5.625	-2	-3.875	-4.625	-5.25	-1.5	-2	-4	-2	3.875	1	-2.58654
Control 6	2	0	0	-1	0	-2	-2	1	-2	-1	0	-3.125	-2	-0.778846
Control 7	2	-2	1	8.375	2	-2	-1	2	1	2	-2	-2.125	-2	0.557692
Control 8	-2	0.375	-0.625	2.375	0.125	1.375	1.75	1.5	4.875	-3	2	-5	4	0.596154
	cases showing hypmethylation
The pyrosequencing analyses were conducted in separate batches of experiments.
CpG coordinates are reported using GRCh38/hg38
Methylation values are normalized on the mean of the controls used for each experiment

## Sheet: S7
Table S7: Pyrosequencing analyses of false positives detected by MS-MLPA
PYROSEQUENCING 1	MEG8:Int2-DMR
Cases	CpGs
	1	2	3	4	5	6	7	8	9	10	11	12	13
	chr14:100904601	chr14:100904618	chr14: 100904621	chr14: 100904633	chr14: 100904642	chr14: 100904646	chr14: 100904651	chr14: 100904654	chr14: 100904663	chr14: 100904667	chr14: 100904672	chr14: 100904692	chr14: 100904702	MEAN
SRS5	-8	-4	-4	-1	1	1	0.75	1.5	-1	-5	2	10	3	-0.288462
Case with MEG8 hypomethylation	-16	-14.625	-14.625	-20.625	-16.875	-19.625	-23.25	-20.5	-25.125	-20	-22.5	-7.125	-18	-18.375
Control 1	-1	-2.625	-1.625	-3.625	-1.875	-2.625	-3.25	-3.5	-3	-2	-5	2.875	-6	-2.55769
Control 2	1	1	2	1	1	0	0	0	0	-3	-1	1.875	0	0.298077
Control 3	1	-3	-3	-2	-2	-3.625	-2	-2	-1	-2	-1	0.875	0	-1.51923
Control 4	1	0.375	-0.625	-0.625	-1.875	-3.625	-2.25	-2.5	-3	-2	-2	3	2	-0.932692
Control 5	-2	-2	-3	-3	-3.875	0	1	-1.5	-2	-4	-2	3.875	3	-1.19231
Control 6	-2	-1	-2	0	0	1	2	-1	-1	0	-1	-3.125	3	-0.394231
Control 7	2	2	3	2	2	3	3	3	4	2	1	-2.125	1	1.99038
Control 8	-2	0.375	-0.625	2.375	0.125	1.375	1.75	1.5	4.875	-3	2	-2	4	0.826923
PYROSEQUENCING 2	MEG8:Int2-DMR
Cases	CpGs
	1	2	3	4	5	6	7	8	9	10	11	12	13
	chr14:100904601	chr14:100904618	chr14: 100904621	chr14: 100904633	chr14: 100904642	chr14: 100904646	chr14: 100904651	chr14: 100904654	chr14: 100904663	chr14: 100904667	chr14: 100904672	chr14: 100904692	chr14: 100904702	MEAN
Healthy Control 53	-11	-9	-4.85714	1.85714	-1	3.57143	-1.28571	-4.42857	-6	-3.28571	-2.42857	-3	-2	-3.2967
Case with MEG8 hypomethylation	-25.1429	-31.5714	-30.8571	-24.1429	-23	-23.4286	-25.2857	-25.4286	-30	-27.2857	-20.4286	-23.7143	-23	-25.6374
Control 1	0.857143	2.42857	0.142857	-7.14286	0	-5.42857	-5.28571	-2.42857	-1	-0.285714	-4.42857	-1.71429	-1	-1.94505
Control 2	2.85714	-0.571429	1.14286	0.857143	0	1.57143	2.71429	1.57143	2	2.71429	1.57143	2.28571	-2	1.28571
Control 3	-3	0	-2	-3	-5	-2	-2	-3.42857	-4	-2	-2	1.28571	0	-2.08791
Control 4	-0.142857	5.42857	2	2	3	2	2	2	3	2	2	2.28571	1	2.1978
Control 5	4.85714	5.42857	4.14286	7.85714	6	6.57143	5.71429	3.57143	5	3.71429	3.57143	1.28571	6	4.9011
Control 6	1.85714	-0.571429	-2.85714	-7.14286	-3	-6.42857	-4.28571	-5.42857	-3	-6.28571	-2.42857	-1.71429	-4	-3.48352
Control 7	-5.14286	-2	-3.85714	6.85714	-2	5.57143	0.714286	-1.42857	-2	-2.28571	1.57143	-3.71429	0	-0.593407
PYROSEQUENCING 3	MEG8:Int2-DMR
Cases	CpGs
	1	2	3	4	5	6	7	8	9	10	11	12	13
	chr14:100904601	chr14:100904618	chr14: 100904621	chr14: 100904633	chr14: 100904642	chr14: 100904646	chr14: 100904651	chr14: 100904654	chr14: 100904663	chr14: 100904667	chr14: 100904672	chr14: 100904692	chr14: 100904702	MEAN
Healthy Control 54	-12.4	-9.4	-6.2	0	-4	-2.8	-5.8	-6.2	-7.8	-8	-1	-8	-6.8	-6.03077
Case with MEG8 hypomethylation	-22.4	-24.4	-24.2	-24	-28	-25.8	-30.8	-31.2	-28.8	-27	-25.2	-24	-29.8	-26.5846
Control 1	0.6	-1.4	1.8	1	3	-1.8	-0.8	-0.2	0.2	-2	0.8	6	-4.8	0.184615
Control 2	-3.4	1.6	0.8	-2	0	-1.8	-2.8	-2.2	0.2	0	0.8	1	2.2	-0.430769
Control 3	2.6	0.6	-1.2	-1	-2	-1.8	0.2	0.8	-1.8	0	-1.2	-3	0.2	-0.584615
Control 4	1.6	1.6	-0.2	-1	1	1.2	2.2	-0.2	2.2	2	-0.2	2	2.2	1.10769
Control 5	-1.4	-2.4	-1.2	3	-2	4.2	1.2	1.8	-0.8	0	-0.2	-6	0.2	-0.276923
Control 6	-1.4	-2.4	-1.2	3	-2	4.2	1.2	1.8	-0.8	0	-0.2	0	0	0.169231
	cases showing hypmethylation
The pyrosequencing analyses were conducted in separate batches of experiments.
CpG coordinates are reported using GRCh38/hg38
Methylation values are normalized on the mean of the controls used for each experiment

## Sheet: S8
Table S8: ImprintCap results of the MEG8:Int2-DMR in 13 healthy controls
chr	5' location (hg38)	DMR	Control1	Control2	Control3	Control4	Control5	Control6	Control7	Control8	Control9	Control10	Control11	Control12	Control13
chr14	100904423	MEG8	11.3582	32.9238	30.8474	34.0163	19.51	35.9865	31.1702	36.9326	40.9376	37.7452	29.355	28.4852	39.4906
chr14	100904442	MEG8	19.6188	39.7022	40.7982	35.0471	24.3875	43.7674	37.4042	45.1399	47.0783	47.1815	40.4897	38.6585	45.566
chr14	100904462	MEG8	21.6839	42.6072	38.8081	39.1703	26.3385	41.8221	41.5602	46.1658	46.0548	48.2299	40.4897	39.6759	46.5786
chr14	100904467	MEG8	23.749	43.5756	42.7884	40.2011	28.2895	46.6852	44.6772	47.1917	49.1251	50.3269	43.5264	43.7452	47.5912
chr14	100904518	MEG8	25.8142	41.6389	41.7933	42.2627	31.216	44.74	43.6382	45.1399	44.0079	45.0845	39.4775	42.7279	44.5534
chr14	100904526	MEG8	19.6188	33.8921	34.8278	31.9547	24.3875	38.9043	37.4042	38.9845	38.8907	41.9391	33.404	35.6066	42.5283
chr14	100904565	MEG8	23.749	38.7338	35.8228	39.1703	29.265	38.9043	37.4042	41.0363	40.9376	41.9391	35.4285	33.5719	39.4906
chr14	100904598	MEG8	42.3353	43.5756	45.7736	43.2935	34.1425	45.7126	45.7162	46.1658	42.9845	46.133	47.5754	41.7105	47.5912
chr14	100904601	MEG8	42.3353	40.6705	45.7736	40.2011	32.1915	42.7947	44.6772	45.1399	42.9845	45.0845	45.5509	38.6585	45.566
chr14	100904618	MEG8	48.5307	41.6389	48.7589	44.3243	37.069	44.74	45.7162	45.1399	44.0079	46.133	48.5877	43.7452	47.5912
chr14	100904621	MEG8	45.433	41.6389	47.7638	45.3551	38.0445	45.7126	45.7162	46.1658	45.0314	46.133	47.5754	45.7799	48.6038
chr14	100904633	MEG8	47.4981	41.6389	47.7638	45.3551	38.0445	45.7126	44.6772	47.1917	47.0783	47.1815	46.5632	45.7799	49.6163
chr14	100904642	MEG8	47.4981	41.6389	47.7638	45.3551	39.9955	43.7674	43.6382	45.1399	47.0783	46.133	47.5754	46.7972	49.6163
chr14	100904646	MEG8	48.5307	42.6072	47.7638	44.3243	40.971	45.7126	45.7162	46.1658	47.0783	47.1815	48.5877	45.7799	48.6038
chr14	100904651	MEG8	45.433	41.6389	47.7638	43.2935	39.02	42.7947	42.5992	45.1399	47.0783	46.133	48.5877	45.7799	48.6038
chr14	100904654	MEG8	47.4981	42.6072	45.7736	45.3551	39.9955	43.7674	41.5602	46.1658	48.1017	46.133	48.5877	47.8145	49.6163
chr14	100904663	MEG8	47.4981	43.5756	44.7785	42.2627	38.0445	44.74	41.5602	55.399	48.1017	46.133	45.5509	43.7452	46.5786
chr14	100904667	MEG8	46.4655	43.5756	45.7736	38.1395	38.0445	42.7947	41.5602	46.1658	48.1017	45.0845	44.5387	41.7105	46.5786
chr14	100904672	MEG8	48.5307	44.5439	47.7638	42.2627	39.9955	42.7947	43.6382	47.1917	45.0314	47.1815	46.5632	41.7105	43.5409
chr14	100904692	MEG8	48.5307	48.4173	49.7539	40.2011	40.971	44.74	42.5992	48.2176	47.0783	48.2299	44.5387	43.7452	44.5534
chr14	100904702	MEG8	47.4981	45.5123	46.7687	37.1087	34.1425	44.74	42.5992	45.1399	45.0314	47.1815	42.5142	41.7105	43.5409
chr14	100904707	MEG8	46.4655	47.449	47.7638	42.2627	39.02	46.6852	43.6382	45.1399	46.0548	47.1815	43.5264	41.7105	46.5786
chr14	100904714	MEG8	46.4655	45.5123	48.7589	42.2627	38.0445	46.6852	45.7162	47.1917	48.1017	49.2784	43.5264	42.7279	46.5786
chr14	100904730	MEG8	39.2376	41.6389	43.7835	43.2935	39.02	45.7126	43.6382	44.114	45.0314	50.3269	46.5632	43.7452	45.566
chr14	100904747	MEG8	37.1724	39.7022	43.7835	41.2319	36.0935	45.7126	43.6382	45.1399	44.0079	47.1815	45.5509	43.7452	47.5912
chr14	100904753	MEG8	40.2701	40.6705	44.7785	45.3551	39.02	45.7126	45.7162	46.1658	46.0548	49.2784	48.5877	48.8318	51.6415
chr14	100904773	MEG8	40.2701	40.6705	44.7785	39.1703	38.0445	42.7947	45.7162	45.1399	46.0548	48.2299	48.5877	45.7799	50.6289
chr14	100904785	MEG8	40.2701	40.6705	41.7933	34.0163	33.167	41.8221	41.5602	44.114	45.0314	46.133	49.5999	42.7279	48.6038
chr14	100904801	MEG8	42.3353	44.5439	43.7835	38.1395	36.0935	45.7126	43.6382	44.114	48.1017	48.2299	46.5632	46.7972	48.6038
chr14	100904808	MEG8	43.3678	47.449	41.7933	42.2627	34.1425	45.7126	43.6382	44.114	50.1486	50.3269	46.5632	45.7799	45.566
chr14	100904828	MEG8	40.2701	47.449	40.7982	43.2935	36.0935	44.74	41.5602	41.0363	48.1017	48.2299	44.5387	44.7625	44.5534
chr14	100904857	MEG8	41.3027	49.3856	47.7638	45.3551	42.922	46.6852	45.7162	47.1917	48.1017	49.2784	50.6121	48.8318	50.6289
chr14	100904862	MEG8	39.2376	48.4173	45.7736	42.2627	41.9465	44.74	43.6382	45.1399	47.0783	48.2299	49.5999	47.8145	51.6415
chr14	100904875	MEG8	42.3353	54.2274	53.7343	43.2935	48.775	50.5756	54.0283	57.4508	58.3361	55.5693	58.7101	52.9012	56.7044
chr14	100904887	MEG8	36.1399	44.5439	44.7785	44.3243	38.0445	43.7674	43.6382	48.2176	47.0783	47.1815	47.5754	47.8145	48.6038
chr14	100904896	MEG8	26.8467	42.6072	39.8032	40.2011	33.167	38.9043	38.4432	45.1399	47.0783	44.036	43.5264	39.6759	45.566
chr14	100904909	MEG8	41.3027	52.2907	48.7589	47.4167	39.02	46.6852	46.7552	54.3731	53.2189	52.4238	53.6489	47.8145	51.6415
chr14	100904942	MEG8	34.0747	45.5123	41.7933	43.2935	36.0935	42.7947	42.5992	46.1658	46.0548	44.036	45.5509	40.6932	44.5534
chr14	100904995	MEG8	43.3678	48.4173	47.7638	52.5707	37.069	43.7674	47.7942	47.1917	47.0783	51.3754	48.5877	45.7799	48.6038
chr14	100904999	MEG8	47.4981	62.9425	58.7096	61.8478	48.775	55.4386	60.2623	62.5803	64.4767	62.9086	64.7835	54.9358	58.7295
chr14	100905027	MEG8	55.7586	74.5626	75.626	73.1866	68.285	69.0552	74.8084	74.8912	80.8518	76.5388	77.9427	73.2478	79.9937
chr14	100905080	MEG8	44.4004	74.5626	67.6654	68.0326	53.6525	58.3565	70.6524	75.9171	71.6408	73.3934	66.808	56.9705	64.805
	CpGs analysed by MS-MLPA
	CpGs analysed by pyrosequencing

## Sheet: S9
Table S9: Additional information on SNVs and indels in PLAG1
Cases	gDNA (hg38)	cDNA	Protein	Effect	ACMG classification	Variant ID (dbSNP)	Allele frequency (ALL)	Conservation scores	CADD score	PolyPhen-2	SIFT	AlphaMissense	REVEL
SRS1	chr8:56166382 TG>T	NM_002655.2: c.1363del	p.(Gln455Serfs*16)	frameshift-premature stop codon	Likely Pathogenic (PVS1, PM2, PM6)	novel	-	7,612 (high conservation)	34 (highly likely deleterious)	-	-	-	-
SRS2	chr8:56167306 CT>C	NM_002655.2: c.439del	p.(Ser147Valfs*82)	frameshift-premature stop codon	Pathogenic (PVS1, PM2, PP1)	novel	-	3,059 (low conservation)	32 (highly likely deleterious)	-	-	-	-
SRS3	chr8:56167146 G>GA	NM_002655.2: c.599dup	p.(Arg201Profs*52)	frameshift-premature stop codon	Likely Pathogenic (PVS1, PM2, PM6)	novel	-	9,325 (high conservation)	33 (highly likely deleterious)	-	-	-	-
SRS6	chr8:56167201 T>A	NM_002655.3 : c.545A > T	p.(Glu182Val)	missense	VUS - Low Pathogenic Support - (PM2, BP1)	novel	-	8,017 (high conservation)	27,6 (likely deleterious)	-	probably damaging	uncertain	uncertain
SRS7	chr8:56167133 CCAT>C	NM_002655.3: c.610_612del	p.(Met204del)	in-frame deletion	Likely pathogenic (PM1, PM2, PM4, PP1)	novel	-	9,325 (high conservation)	22 (probaby deleterious)	-	-	-	-
SRS8	chr8:56167075 C>T	NM_002655.3: c.671G > A	p.(Arg224Gln)	missense	Likely pathogenic (PM1, PM2, PP1, PP3, BP1)	novel	-	7,905 (high conservation)	32 (highly likely deleterious)	probably damaging	deleterious	pathogenic	uncertain
SRS9	chr8:56166723 A>T	NM_002655.3: c.1023T>A	p.(Tyr341*)	premature stop	Likely Pathogenic (PVS1, PM2, PP1)	novel	-	-1,295 (low conservation)	22 (probaby deleterious)	-	-	-	-
SRS10	chr8:56167079 CA>C	NM_002655.3: c.666del	p.( Phe222Leufs*7)	frameshift-premature stop codon	Likely Pathogenic (PVS1, PM2, PP1)	novel	-	9,325 (high conservation)	22 (probaby deleterious)	-	-	-	-
SRS11	chr8:56167219 G>T	NM_002655.3: c.527C>A	p.(Ser176*)	premature stop	Likely Pathogenic (PVS1, PM2)	novel	-	7,811 (high conservation)	38 (highly likely deleterious)	-	-	-	-
SRS12	chr8:56166243 CTACTGAAAAGCTTGATGGAAACGTGGGAGGGTGGTACTTGTGCTTAAA>C	NM_002655.3: c.1455_1502del	p.(Ser485delinsArgAspSerGlyThrTrpIleHisTyrArgAsnValCysValAlaValPro*)	stop loss	Likely Pathogenic (PVS1, PM2, PM4, PP1)	novel	-	9,602 (high conservation)	22 (probaby deleterious)	-	-	-	-
SRS13	chr8:56166965 GCA>G	NM_002655.3: c.779_780del	p.(Val260Alafs*16)	frameshift-premature stop codon	Likely Pathogenic (PVS1, PM2, PP1)	novel	-	6,275 (high conservation)	33 (highly likely deleterious)	-	-	-	-
SRS14	chr8:56166975 AT>A	NM_002655.3: c.770del	p.(Asn257Metfs*6)	frameshift-premature stop codon	Likely Pathogenic (PVS1, PM2)	novel	-	3,245 (low conservation)	28,8 (probaby deleterious)	-	-	-	-
SRS15	chr8:56168390 GA>G	NM_002655.3:c.-117-5del	p.?	non-coding (intron-exon boundary)	VUS - Uncertain pathogenicity (BP4)	rs1023307529	0.0005235	8,122 (high conservation)	14,73 (likely benign)	-	-	-	-
SRS16	chr8:56166584 T>C	NM_002655.3: c.1162A>G	p.(Ile388Val)	missense	VUS - Uncertain pathogenicity (PM2, BP4, BP1)	rs765459935	0.00001593	-0,06 (low conservation)	1,8 (likely benign)	benign	tolerated	benign	benign
